# Supplementary material
Source: PubMed Central journal article supplement (PMC4260556)

## Supporting Information

### **$\alpha_{2A}$ adrenergic receptor promotes amyloidogenesis through disrupting APP-SorLA interaction**

Yunjia Chen<sup>a,1</sup>, Yin Peng<sup>a,1</sup>, Pulin Che<sup>a</sup>, Mary Gannon<sup>a</sup>, Yin Liu<sup>a,2</sup>, Ling Li<sup>c</sup>, Guojun Bu<sup>d</sup>, Thomas van Groen<sup>a</sup>, Kai Jiao<sup>b</sup> and Qin Wang<sup>a</sup>

<sup>a</sup> Department of Cell, Developmental and Integrative Biology, University of Alabama at Birmingham, 1918 University Boulevard, Birmingham, AL 35294

<sup>b</sup> Department of Genetics, University of Alabama at Birmingham, 720 20<sup>th</sup> Street South, Birmingham, AL 35294

<sup>c</sup> Department of Experimental and Clinical Pharmacology, University of Minnesota, Minneapolis, MN 55455.

<sup>d</sup> Alzheimer's Disease Research Center, Mayo Clinic, Jacksonville, FL 32224

Corresponding author: Qin Wang, MD, PhD, 986 MCLM 1918 University Blvd., Birmingham, Alabama, U.S.A. 35294. Phone +1 205 996 5099, Fax +1 205 975 9028, E-mail [qinwang@uab.edu](mailto:qinwang@uab.edu)

## **Materials and Methods**

### ***Antibodies and Chemicals***

Antibodies for GAPDH and tubulin were purchased from Millipore and Developmental Studies Hybridoma Bank at The University of Iowa, respectively. APP rabbit monoclonal antibody (Y188) and golgi58 antibody were from Abcam. A $\beta$ 1-16 (6E10) antibody was from Covance. sAPP $\beta$  antibody was from Immuno Biological Lab (IBL). BACE1 and GFAP antibodies were purchased from Sigma-Aldrich. GFP monoclonal antibody was from Roche Applied Science. EEA1 and Myc-tag antibodies were purchased from Cell Signaling Technology. Rab5 and SorLA (SORL1) antibody were from Stressgen and ProteinTech, respectively. IBA-1 antibody was from Wako. AlexaFluor 488- and 594-conjugated secondary antibodies used for immunofluorescence microscopy were from Life Technologies. IRDye 680 and IRDye 800 secondary antibodies used for Western blot analysis by LI-COR Odyssey Imaging System were from LI-COR. DAB kit for detection of immunohistochemical signals was purchased from Dako EnVision+System. AlphaScreen<sup>®</sup> cAMP Assay Kit was from PerkinElmer.

Clondine and BRL44408 were purchased from Sigma-Aldrich. Idazoxan was from RBI (Research Biochemicals International). Nycodenz was from Accurate Chemical & Scientific Corp. All other chemicals were from Sigma-Aldrich or Fisher Scientific.

### ***Animals and drug treatment.***

Mice were housed in the AAALAC-accredited Animal Resources Program facility at the University of Alabama at Birmingham in accordance with procedures of the Animal Welfare Act and the 1989 amendments to the Act, and all studies followed protocols approved by the UAB Institutional Animal Care and Use Committee. All strains of mice have been backcrossed for

more than twelve generations to C57BL/6 background. Double transgenic mice carrying *APP(swe)* and *PS1(ΔE9)* transgenes, which have been integrated in the same locus (1, 2), were originally obtained from Jackson Laboratory (strain name B6C3-Tg(APP<sup>swe</sup>,PSEN1<sup>dE9</sup>)85Dbo/J; stock number 004462). *Adra2a*<sup>-/-</sup> mice were crossed with *APP/PS1* mice first, and the resulting F1 *APP/PS1,Adra2a*<sup>+/-</sup> mice were then crossed with *Adra2a*<sup>+/-</sup> mice to generate *APP/PS1,Adra2a*<sup>+/+</sup>, *APP/PS1,Adra2a*<sup>+/-</sup> and *APP/PS1,Adra2a*<sup>-/-</sup> mice. Age- and gender-matched littermate mice were compared at 6 month-old age.

*APP/PS1* and non-transgenic littermates were treated with saline or clonidine (0.5mg/kg) through intraperitoneal injection twice a day starting from 4 months of age for 8 weeks. Age- and gender-matched littermates were compared. For idazoxan (3mg/kg, i.p. twice daily) treatment, male *APP/PS1* and non-transgenic littermates were injected twice a day starting from 10 weeks of age for 10 weeks. Mice were then untreated for a week to wash out drug before evaluated in behavioral assessment.

***Immunohistochemistry for analysis of amyloid plaques, activated astrocytes and activated microglia.***

Formalin-fixed and paraffin-embedded brain tissues were sectioned at 7μm using a microtome. Immunohistochemistry was performed as described previously (3, 4). Primary antibody 6E10 was used for detection of amyloid plaques, GFAP antibody for activated astrocytes, and IBA-1 for activated microglia. Slices immunostained with GFAP and IBA-1 antibodies were also stained with Congo red for co-detection of Aβ plaques. Multiple images (1mm<sup>2</sup> each) were taken and analyzed from four sections (at different septotemporal levels, but similar lateromedial positions) of each brain region (hippocampus or cortex), with an average across these sections used to generate a single data point for each animal.

### ***Behavior assessment***

Open field and elevated zero maze tests were performed as we described previously (5). Novel object recognition test (6) consists of two phases, training phase and test phase. During a training trial, two identical objects were placed and the animal was allowed to explore the identical objects for 10 min. Twenty hours later, the animal was placed back into the same box, where one of the two familiar objects was replaced with a novel one. Mice were recorded with a video camera for a 20 min testing phase. The time spent on exploring each object (touching, sniffing, and close staring) was documented. Recognition index was calculated as the percentage of time spent on exploring the novel object over the total time spent on exploring both familiar and novel objects.

Morris water maze test was performed as described previously (4, 7). During the acquisition of the spatial task, the escape latency and swim distance were recorded for 4 trials daily for 5 days. The day after the acquisition phase, a probe trial was conducted and the time spent in the target quadrant was measured in a single 60-s trial.

### ***ELISA Measurement of A $\beta$ levels***

Brain A $\beta$  levels in carbonate soluble and insoluble (guanidine soluble) fractions were measured as described previously (3). In brief, mouse cortex or hippocampus was homogenized first in carbonate buffer (100 mM Na<sub>2</sub>CO<sub>3</sub>, 50 mM NaCl, pH 11.5 plus protease inhibitors). Following centrifugation at 18,000  $\times$  g for 20 min at 4°C, the supernatant was collected as the carbonate-soluble fraction. The pellet was subjected to further homogenization for 3–4 h at room temperature in the guanidine solution (5 M guanidine HCl in 50 mM Tris-HCl, pH 8.0 plus protease inhibitors). Following centrifugation at 18,000  $\times$  g for 20 min at 4°C, the supernatant was collected as the carbonate-insoluble fraction. The levels of human A $\beta$ 40 and A $\beta$ 42 in the



soluble and insoluble fractions were measured using A $\beta$ 40- and A $\beta$ 42-specific ELISA kits (Life Technologies), respectively, following the manufacturer's protocol. The levels of mouse endogenous A $\beta$ 40 and A $\beta$ 42 in carbonate-soluble fraction were measured using specific ELISA kits (Life Technologies). To measure A $\beta$  levels in cell culture medium, conditioned media with 48 h of vehicle or clonidine treatment was collected and diluted with the assay buffer provided in A $\beta$ 40- or A $\beta$ 42-specific ELISA kits for measurement following the manufacturer's instruction.

### ***Cell culture***

Neuro-2A (N2a) cells were cultured in DMEM/Opti-MEM (1:1, Life Technologies) supplemented with 5% FBS, 100 U/ml penicillin, 100  $\mu$ g/ml streptomycin and 2 mM glutamine. HEK293 cells were cultured in DMEM with 10% FBS plus penicillin, streptomycin and 2mM glutamine.

Primary culture of cortical neurons was performed as described previously (8). In brief, newborn (postnatal day 0) mouse cortices were dissected out, minced, and digested with papain for 20 min at 37°C. After dissociated by trituration, cortical neurons were plated in Neurobasal-A medium supplemented with 5% FBS, 2% B27, 2% glutamax, 0.2% gentamycin at  $5 \times 10^4$  cells/well in 24-well plates. From the second day, cells were fed with Neurobasal-A medium supplemented with 2% B27, 2% glutamax, 0.2% gentamycin. Culture medium was changed every 4 days. Neurons were treated and analyzed after being cultured for 11-13 days *in vitro* (DIV). It should be noted that there is no noradrenergic input to cortical neurons in these cultures and thus the basal  $\alpha_{2A}$ AR activity is negligible.

### ***Measurement of secreted APP ectodomains in culture medium.***

To measure secreted APP (sAPP), N2a cells stably expressing  $\alpha_{2A}$ AR were transfected with a plasmid encoding hAPP<sup>sw</sup>. 12 hrs post transfection, cells were cultured in serum-free

medium with vehicle or clonidine (1 $\mu$ M). 36 hrs post treatment, culture medium was collected and concentrated with Millipore centrifugal Filter Units (Ultracel-3K) following manufacture's instruction. Cells were lysed and examined for full-length APP expression.

#### ***cAMP assays in cortical neurons.***

cAMP assays were performed using AlphaScreen® Assay Kit from PerkinElmer following the manufacturer's instruction. Cortical neurons cultured on 100mm dishes for 12 DIV were washed once and collected in PBS. The pellet was resuspended with the stimulation buffer (1x HBSS, 0.1% BSA, 0.5mM IBMX, 5mM HEPES, pH7.4) at 1x10<sup>4</sup> cells/ $\mu$ l. Cells were mixed with anti-cAMP acceptor beads and then divided into 5 groups with the following treatment: (1) vehicle; (2) 10 $\mu$ M forskolin; (3) 10 $\mu$ M forskolin and 1 $\mu$ M clonidine; (4) 10 $\mu$ M forskolin, 1 $\mu$ M clonidine and 10 $\mu$ M idazoxan; (5) 10 $\mu$ M forskolin, 1 $\mu$ M clonidine and 10 $\mu$ M BRL44408. 30 min post-stimulation, detection mix containing biotinylated cAMP/streptavidin donor beads in lysis buffer (0.1% BSA, 0.3% Tween20, 5mM HEPES, pH7.4) was added to cells/acceptor beads mix. After 60 min incubation, luminescence was analyzed on a Biotek Synergy2 plate reader using standard  $\alpha$ -screen settings.

#### ***Fluorescence immunocytochemistry***

Fluorescence immunocytochemistry was performed as described previously (9). Fluorescent images were taken under a confocal microscope system Nikon A1R-A1, and analyzed with imaging software NIS-Elements AR4.13.00. The degree of colocalization between two proteins was quantified by Pearson's correlation coefficient using NIS-Elements AR4.13.00 subprogram Analysis Control-Colocalization.

#### ***Subcellular fractionation***

To separate organelles, a one-step subcellular fractionation method was performed using Nycodenz density gradient centrifugation (10). A working Nycodenz solution (20% w/v Nycodenz, 0.25M sucrose, 20mM Tricine, Ph7.4, 1mM EDTA and protease inhibitors) was prepared by mixing 40% w/v Nycodenz stock solution with the sucrose stock solution (1.25M sucrose, 100mM Tricine, Ph7.4 and 5mM EDTA). Then Beckman polycarbonate tubes (3.2 ml, 13x56 mm) were filled to about 90% volume with the Nycodenz working solution and allowed to freeze at -80°C overnight. The solution in tubes was thawed at room temperature several hours before use.

N2a cells stably expressing  $\alpha_{2A}$ AR were treated with vehicle or 1  $\mu$ M clonidine for 30min. Cells were washed once with ice-cold PBS and collected in the sucrose working solution (0.25 M sucrose, 20 mM Tricine, pH 7.4, 1 mM EDTA, and protease inhibitors). After being homogenized by 25g needle 10 times, samples were centrifuged for 15 min at  $1,000 \times g$  at 4°C to remove nuclear fractions. Then the supernatant was subjected to ultracentrifugation at  $100,000 \times g$  for 20 min at 4°C. The pellet (containing organelles) was resuspended in the sucrose working solution and loaded onto the thawed Nycodenz working solution in the Beckman tubes. After being centrifuged in a fix-angled rotor at  $100,000 \times g$  for 16 hours, 12 fractions from top to bottom were collected and subjected to Western blot analyses.

### ***Immunoprecipitation to detect protein-protein interaction***

HEK293 cells stably expressing  $\alpha_{2A}$ AR were co-transfected with plasmids encoding myc-SorLA and hAPP695. 48h post transfection, cells were stimulated with vehicle or 1  $\mu$ M clonidine for 10 min. Cells were then washed once with ice-cold PBS and lysed in immunoprecipitation (IP) buffer (10 mM Tris, pH 7.4, 150mM NaCl, 5 mM EDTA, 5 mM EGTA, 5 mM NaF, 0.3% NP-40, 10% glycerol, and protease inhibitors). APP antibody (Y188) was used to immunoprecipitate

APP following a procedure described previously (11). Alternatively, cell lysates were incubated with a monoclonal Myc antibody to immunoprecipitate myc-SorLA. To block G<sub>i/o</sub> subfamily of G proteins, cells were pretreated with 200ng/ml pertussis toxin (PTX) overnight before stimulation.

To examine APP-BACE1 interaction, HEK293 cells stably expressing  $\alpha_2A$ AR were co-transfected with plasmids encoding BACE1-CFP, hAPP695 and myc-SorLA. 48h post transfection, cells were stimulated with vehicle or 1  $\mu$ M clonidine for 10 min. Cell lysates were subjected to IP assays using an APP antibody (Y188).

For coimmunoprecipitation of endogenous SORLA and APP from brain lysates, adult mice were treated with saline or clonidine (1 mg/kg) through i.p. injection. 30min post-treatment, mouse brain was homogenized on ice in IP buffer described above. The detergent extract was then centrifuged at  $18,000 \times g$  at 4°C for 30 min, and the resulting supernatant was subjected to IP assays with an APP antibody (Y188) or a rabbit polyclonal antibody against SorLA.

#### ***Western blot quantification with LI-COR Odyssey Imaging System.***

All imaging and quantification of Western blots were performed using the LI-COR Odyssey Imaging System following manufacture's instruction. Signal obtained with the digital scanner is directly proportional to the quantity of the target protein, and allows accurate quantification of both low- and high-abundance proteins in a much wider linear range (correlation coefficient  $R_2 > 0.99$ ) than traditional films.

#### ***Statistical Analysis***

All statistical analyses were performed using GraphPad Prism software. Data are expressed as mean  $\pm$  SEM. To determine difference between two groups, Student's *t* test (for normally distributed data) or Mann-Whitney rank sum test (non-normally distributed data) was

performed. Two-way ANOVA was performed to determine variations in multiple groups with two variances.  $p < 0.05$  was considered statistically significant.

## References

1. Jankowsky JL, *et al.* (2001) Co-expression of multiple transgenes in mouse CNS: a comparison of strategies. *Biomol.Eng* 17(6):157-165.
2. Jankowsky JL, *et al.* (2004) Mutant presenilins specifically elevate the levels of the 42 residue beta-amyloid peptide in vivo: evidence for augmentation of a 42-specific gamma secretase. *Hum.Mol.Genet.* 13(2):159-170.
3. Cao D, Lu H, Lewis TL, & Li L (2007) Intake of sucrose-sweetened water induces insulin resistance and exacerbates memory deficits and amyloidosis in a transgenic mouse model of Alzheimer disease. *J.Biol.Chem.* 282(50):36275-36282.
4. Lewis TL, *et al.* (2010) Overexpression of human apolipoprotein A-I preserves cognitive function and attenuates neuroinflammation and cerebral amyloid angiopathy in a mouse model of Alzheimer disease. *J Biol Chem* 285(47):36958-36968.
5. Cottingham C, Li X, & Wang Q (2012) Noradrenergic antidepressant responses to desipramine in vivo are reciprocally regulated by arrestin3 and spinophilin. *Neuropharmacology* 62(7):2354-2362.
6. Antunes M & Biala G (2012) The novel object recognition memory: neurobiology, test procedure, and its modifications. *Cognitive processing* 13(2):93-110.
7. van Groen T, Kadish I, Funke SA, Bartnik D, & Willbold D (2013) Treatment with D3 removes amyloid deposits, reduces inflammation, and improves cognition in aged AbetaPP/PS1 double transgenic mice. *Journal of Alzheimer's disease : JAD* 34(3):609-620.
8. Cottingham C, Chen Y, Jiao K, & Wang Q (2011) The Antidepressant Desipramine Is an Arrestin-biased Ligand at the {alpha}2A-Adrenergic Receptor Driving Receptor Down-regulation in Vitro and in Vivo. *J.Biol.Chem.* 286(41):36063-36075.
9. Chen Y, *et al.* (2012) Neurabin scaffolding of adenosine receptor and RGS4 regulates anti-seizure effect of endogenous adenosine. *J Neurosci* 32(8):2683-2695.
10. Murayama K, Fujimura T, Morita M, & Shindo N (2001) One-step subcellular fractionation of rat liver tissue using a Nycodenz density gradient prepared by freezing-thawing and two-dimensional sodium dodecyl sulfate electrophoresis profiles of the main fraction of organelles. *Electrophoresis* 22(14):2872-2880.
11. Xu J, *et al.* (2008) Protein kinase A phosphorylation of spinophilin modulates its interaction with the alpha 2A-adrenergic receptor (AR) and alters temporal properties of alpha 2AAR internalization. *J Biol Chem* 283(21):14516-14523.

## Supplementary figure legends

**sFig. 1.** Genetic deficiency of the  $\alpha_{2A}$ AR reduces microglial activation in *APP/PS1* mice. Representative images of IBA-1 staining for active microglia in cerebral cortex isolated from 6 month-old male mice with indicated genotypes. Scale bar, 100 $\mu$ m.

**sFig. 2.** Genetic deficiency of the  $\alpha_{2A}$ AR reduces astrocyte activation in *APP/PS1* mice. (A-C) Representative images of GFAP staining for active astrocytes in cerebral cortex isolated from 6 month-old male mice with indicated genotypes. Scale bar, 100 $\mu$ m. (D) Quantification of relative GFAP density. Data (mean  $\pm$  SEM) are expressed as the fold change to the level in *APP/PS1*, *Adra2a*<sup>+/+</sup> mice. n=7 for each genotype. \*,  $p < 0.05$ ; \*\*,  $p < 0.01$ , compared to *APP/PS1*, *Adra2a*<sup>+/+</sup> mice.

**sFig. 3.** Activation of the  $\alpha_{2A}$ AR by norepinephrine (NE) enhances production of A $\beta$  peptides. (A) Cortical neurons were treated with 10 $\mu$ M NE (plus 1 $\mu$ M propranolol and 1 $\mu$ M prazosin) or vehicle for 48 hrs. The level of A $\beta$ 42 in culture medium was measured by ELISA. Data (mean  $\pm$  SEM) are expressed as the fold change to control. n=4 for each treatment group. \*,  $p < 0.05$ , NE vs. control. (B) N2a cells expressing hAPP and  $\alpha_{2A}$ AR were treated with 10 $\mu$ M NE (plus propranolol and prazosin) or vehicle for 48 hrs. The levels of A $\beta$ 40 in culture medium were measured by ELISA. Data (mean  $\pm$  SEM) are expressed as the fold change to control. n=6 for each group. \*\*\*,  $p < 0.0001$ , NE vs. control.

**sFig. 4.** Clonidine inhibits cAMP production through the  $\alpha_{2A}$ AR and promotes A $\beta$  generation in primary cortical neurons. (A) Forskolin-induced cAMP production in cortical neurons with indicated treatment. The concentration of each indicated drug was 1 $\mu$ M. Clon, clonidine; BR, BRL44408; ID, idazoxan. Data (mean  $\pm$  SEM) are expressed as the fold change to vehicle control. n=4-6 for each treatment group. \*\*,  $p < 0.01$ , compared to vehicle control. (B) The level

of A $\beta$ 40 in culture medium of cortical neurons treated with vehicle or clonidine for 24 hrs. Data (mean  $\pm$  SEM) are expressed as the fold change to control. n=4 for each treatment group. \*\*,  $p < 0.01$ , compared to vehicle control.

**sFig. 5.** Expression of endogenous APP, SorLA and BACE1 following  $\alpha_{2A}$ AR activation. N2a cells expressing  $\alpha_{2A}$ AR were stimulated with clonidine for indicated time durations. Total cell lysates were separated by SDS-PAGE and blotted for indicated proteins.

**sFig. 6.** Activation of  $\alpha_{2A}$ AR disrupts APP-SorLA interaction. (A) Interaction of endogenous APP and SorLA in mouse brain. Mice were treated with saline or clonidine for 30min and lysates of cerebral cortex were subjected to IP assays using an APP antibody (Y188). (B) HEK293 cells expressing  $\alpha_{2A}$ AR, Myc-SorLA and hAPP were treated with vehicle or clonidine, and cell lysates were subjected to immunoprecipitation (IP) assays using a Myc antibody.

**sFig. 7.** Adenosine A1R and SEMA6D cannot be co-immunoprecipitated with SorLA from brain lysates. Mice were treated with saline or clonidine for 30min and brain lysates were subjected to IP assays using a SorLA antibody.

**sFig. 8.** Activation of the  $\alpha_{2A}$ AR enhances APP localization in recycling endosomes. N2a cells expressing the  $\alpha_{2A}$ AR were treated with vehicle or 1 $\mu$ M clonidine for 15 min. (A) Representative images showing localization of the endogenous APP (by Y188 antibody) together with Rab11. Scale bar, 10 $\mu$ m. (B) Colocalization was quantified by Pearson's correlation coefficient. n=13-18 cells for each group. \*\*\*,  $p < 0.001$ , clonidine vs. vehicle.

**sFig. 9.** Activation of the  $\alpha_{2A}$ AR reduces APP localization in Golgi and enhances its localization in early endosomes in primary cortical neurons. Cortical neurons were treated with vehicle or 1 $\mu$ M clonidine for 15 min. Representative images showing localization of the endogenous APP (by Y188 antibody) together with Golgi58k (A) or EEA1 (C). Scale bar, 10 $\mu$ m. Colocalization



was quantified by Pearson's correlation coefficient (*B* and *D*).  $n=10-13$  cells for each group. \*\*\*,  $p<0.001$ , compared to vehicle treated cells.

**sFig. 10.** The full representative Western blots with all subcellular fractions prepared from cells treated with vehicle (*A*) or clonidine (*B*). Endogenous APP, BACE1, Rab5, Golgi58k and KDEL were blotted with specific antibodies.

**sFig. 11.** Activation of  $\alpha_{2A}$ AR promotes APP-BACE1 interaction in cultured cells and in mouse brain. (*A*) HEK293 cells expressing  $\alpha_{2A}$ AR, APP and BACE1-CFP were treated with vehicle or clonidine, and cell lysates were subjected to immunoprecipitation (IP) assays using an APP antibody (Y188). (*B*) Mice were treated with saline or clonidine for 30min and lysates of cerebral cortex were subjected to IP assays using BACE1 antibody. Mature APP was co-immunoprecipitated with BACE1.

**sFig. 12.** Activation the  $\alpha_{2A}$ AR has a negligible effect on  $\alpha$  secretase cleavage of APP. (*A & B*) N2a cells exogenously expressing  $\alpha_{2A}$ AR and hAPP<sup>sw</sup> were stimulated with clonidine (1 $\mu$ M) or vehicle for 36 hrs. Quantitation of C83 (*A*) and sAPP $\alpha$  (*B*) as a ratio over the APP-FL was measured. Representative blots are shown in Fig. 6. Data represents mean  $\pm$  SEM.  $n=5-6$  for each treatment group. (*C & D*) APP/PS1 mice treated with clonidine or saline for 8 weeks. Quantitation of C83 (*C*) and sAPP $\alpha$  (*D*) as a ratio over the APP-FL was measured. Representative blots are shown in Fig. 6.  $n=5-6$  for each treatment group. (*E*) N2a cells exogenously expressing  $\alpha_{2A}$ AR and C99 were stimulated with NE (10 $\mu$ M plus propranolol and prazosin), clonidine (1 $\mu$ M) or vehicle for 36 hrs. The level of A $\beta$ 40 was measured by ELISA.  $n=6$  for each treatment group.

**sFig. 13.** Idazoxan treatment reduces endogenous A $\beta$  production in nTg mice. The levels of endogenous mouse A $\beta$ 40 (*A*) and A $\beta$ 42 (*B*) in the cortex of nTg mice treated with saline or

idazoxan for 10 weeks. Data (mean  $\pm$  SEM) are expressed as the fold change to the A $\beta$  concentration in saline-treated mice. n=10-14 in each treatment group. \*,  $p<0.05$ ; \*\*,  $p<0.01$ , idazoxan vs. control.

**sFig. 14.** Open field analysis of nTg and *APP/PS1* mice treated with saline or clonidine. (A) Total distance traveled during the open field trial. (B) Time spent in the center of the open field area expressed as a percentage over total trial time.

**sFig. 15.** Elevated zero maze analysis of nTg and *APP/PS1* mice treated with saline or clonidine. (A) Percent time spent in open areas of elevated zero maze during trial. (B) Entries into open areas of the maze.

**sFig. 16.** Morris water maze test of nTg and *APP/PS1* mice treated with saline or clonidine. (A) Travel distance in water was measured on each day of training. Data represent mean  $\pm$  SEM. (B) Representative swim route in probe trial on the last day. (C) Quantification of time spent in the target quadrant in probe trial. The dashed line indicates the 25% level. n=11 for the nTg + saline and *APP/PS1* + saline; n=9 for nTg + idazoxan; n=8 for *APP/PS1* + idazoxan. \*,  $p<0.05$ ; \*\*,  $p<0.01$ , saline-treated vs. idazoxan-treated *APP/PS1*. †,  $p<0.05$ ; ††,  $p<0.01$ , saline-treated *APP/PS1* vs. nTg.

**sFig. 17.** Proposed model for  $\alpha_{2A}$ AR-mediated regulation of APP sorting and processing. Without  $\alpha_{2A}$ AR stimulation, SorLA strongly interacts with mature APP, sorting APP from endosomes to TGN and retaining APP in TGN. As a result, amyloidogenic processing of APP is reduced. When  $\alpha_{2A}$ AR is activated, SorLA-APP interaction is disrupted downstream of G $_{i/o}$  signaling. This leads to reduced APP distribution to TGN. Concurrently, APP colocalization and interaction with BACE1 in endosomes are enhanced. Consequently, more APP is cleaved by BACE1 and more A $\beta$  is generated.

sFig. 1

***APP/PS1 Adra2a<sup>+/+</sup>***

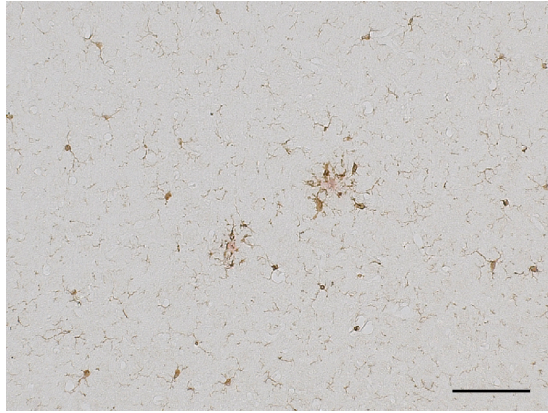

***APP/PS1 Adra2a<sup>+/-</sup>***

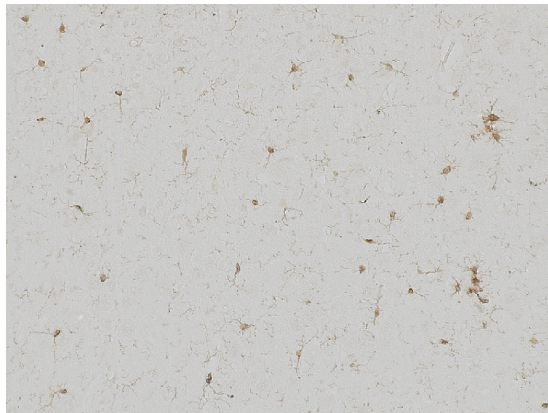

***APP/PS1 Adra2a<sup>-/-</sup>***

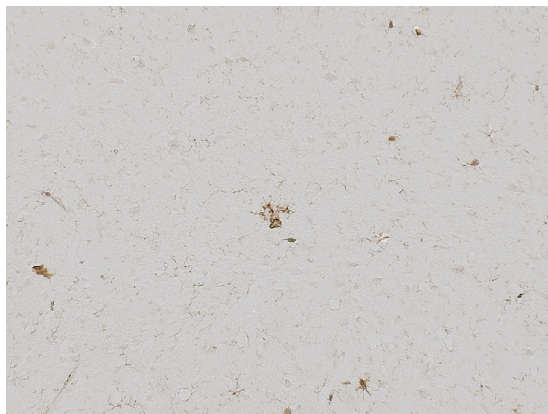

sFig. 2

**A** *APP/PS1 Adra2a<sup>+/+</sup>*

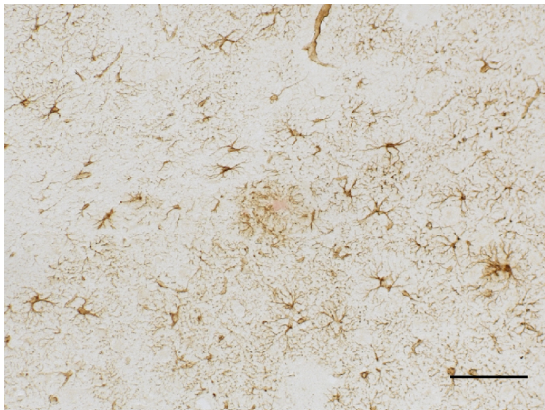

**B** *APP/PS1 Adra2a<sup>+/-</sup>*

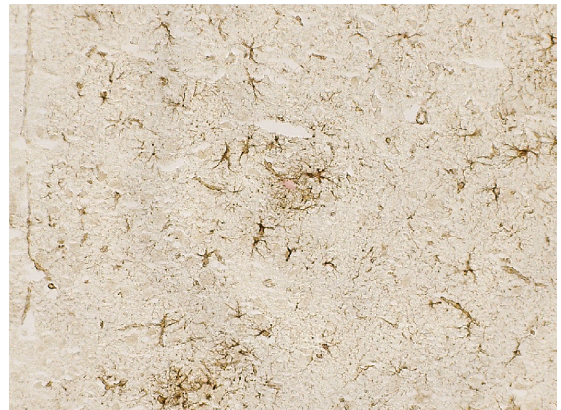

**C** *APP/PS1 Adra2a<sup>-/-</sup>*

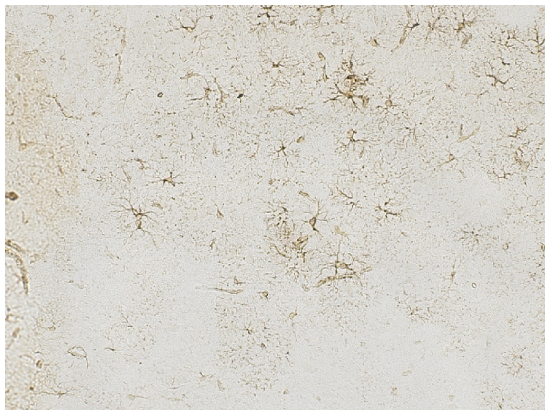

**D**

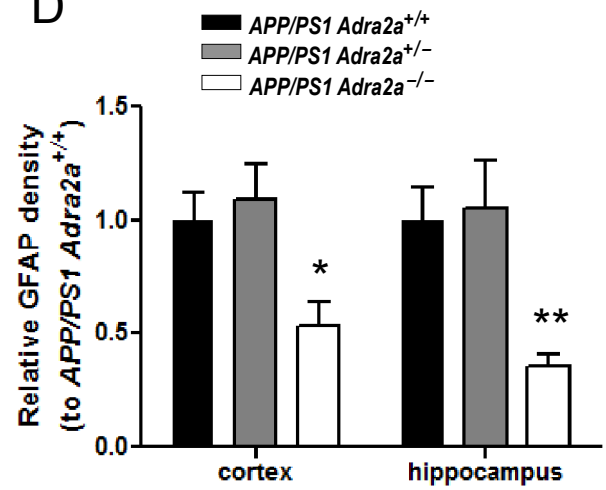

sFig. 3

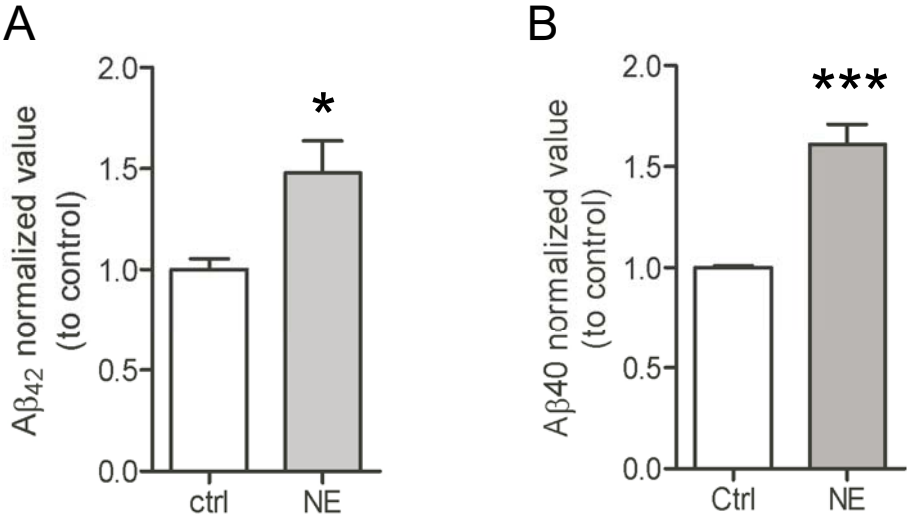

sFig. 4

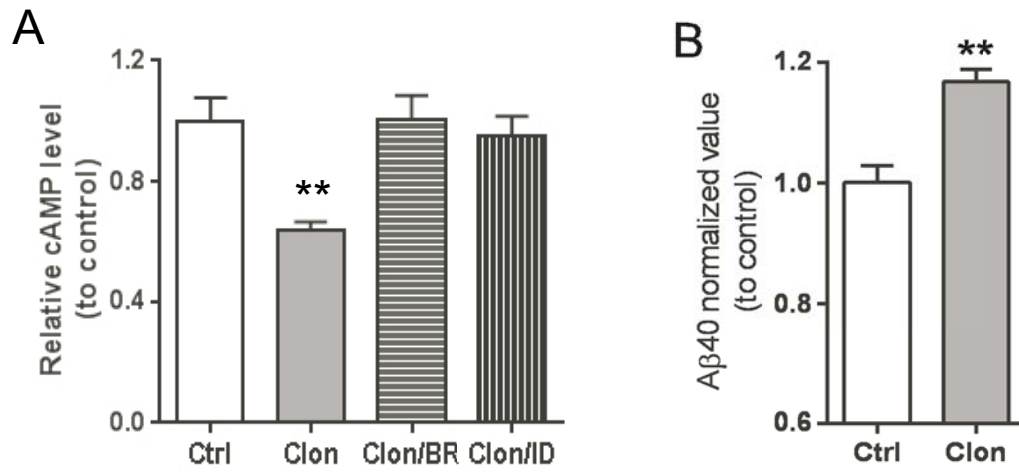

sFig. 5

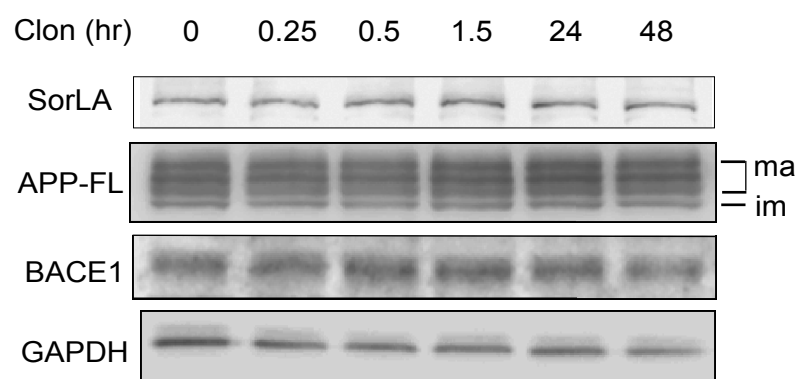

sFig. 6

A

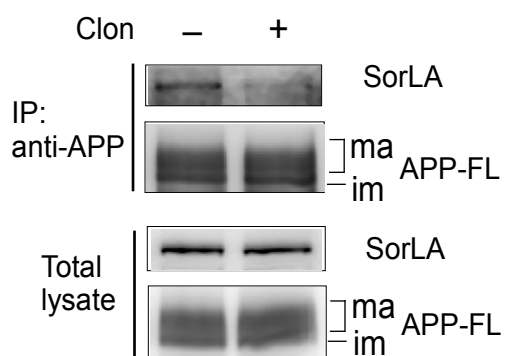

B

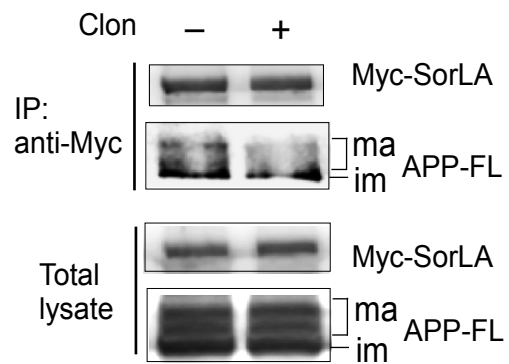



sFig. 7

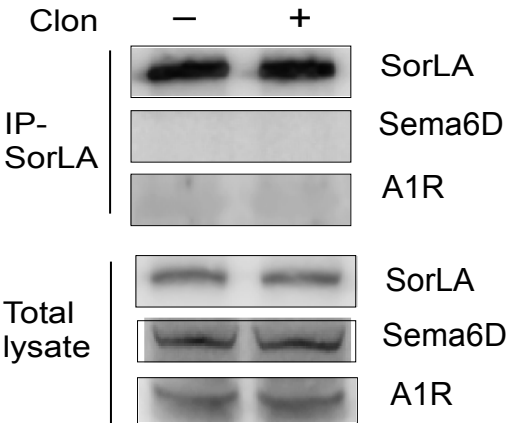

sFig. 8

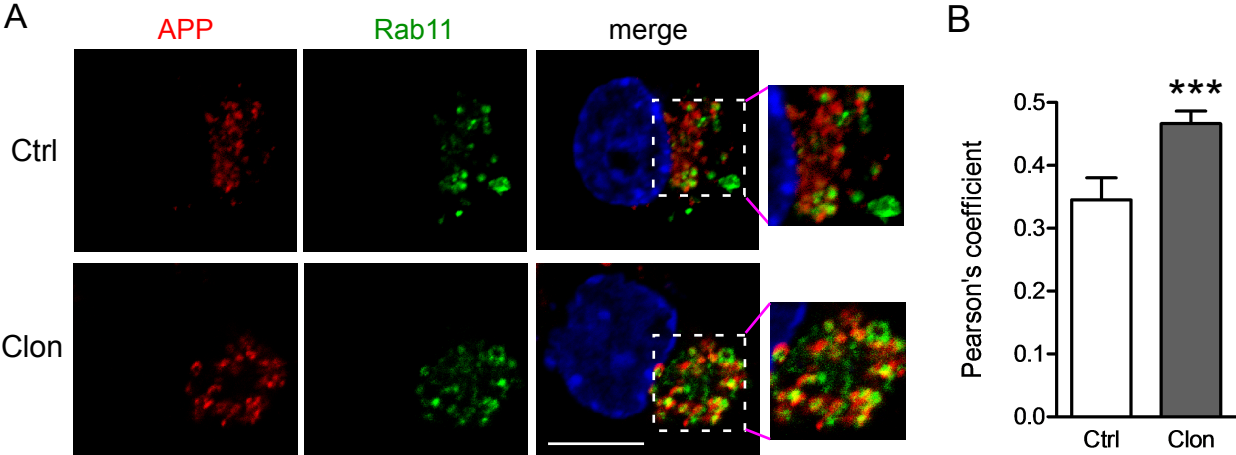

sFig. 9

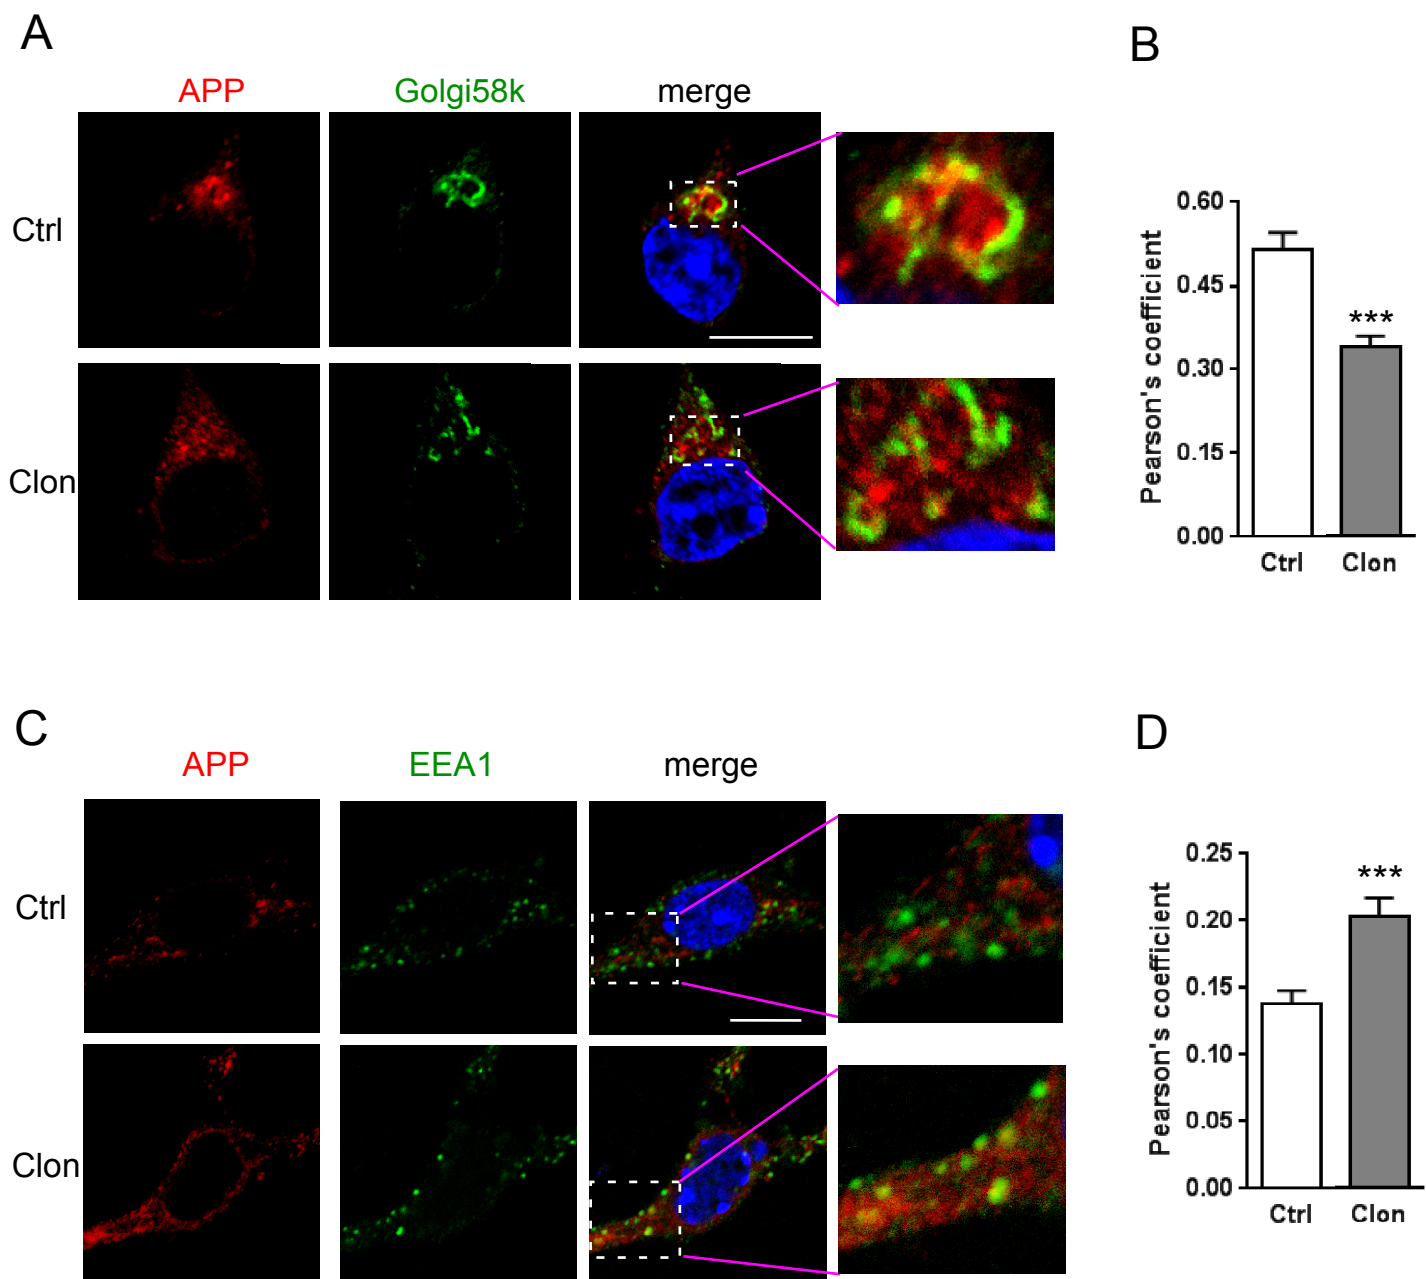

sFig. 10

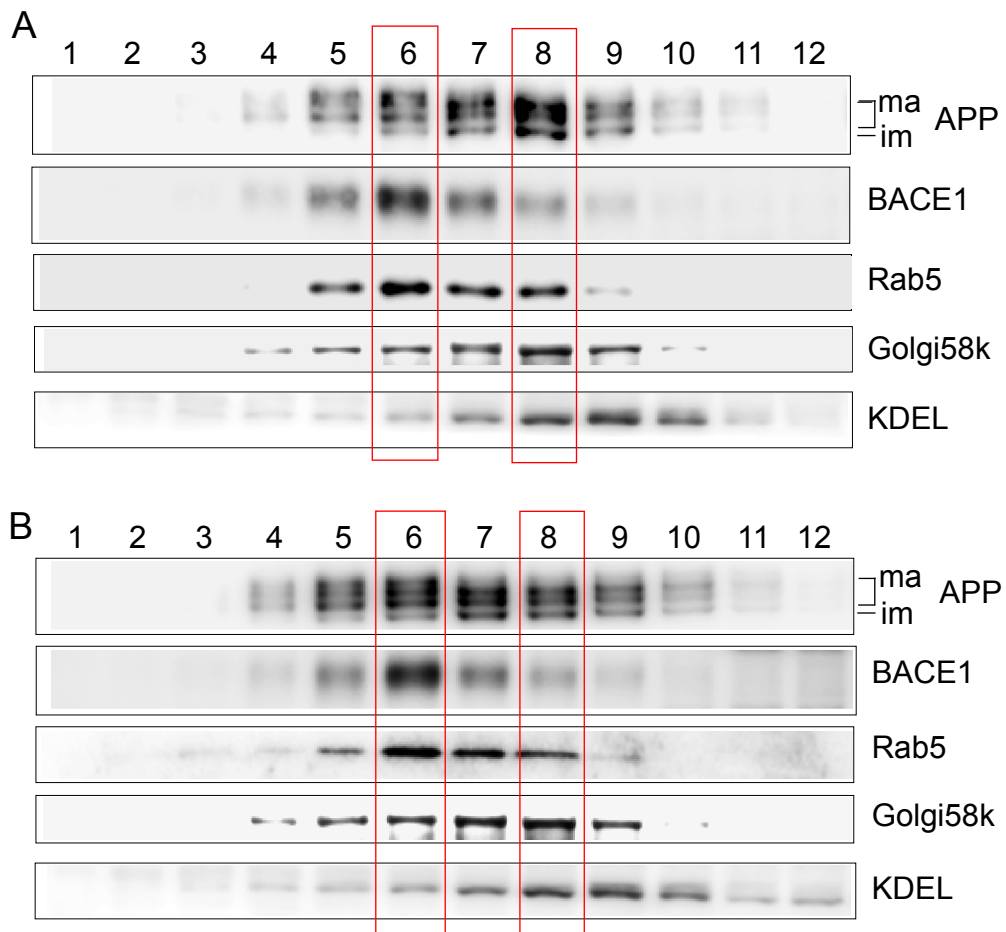

sFig. 11

A

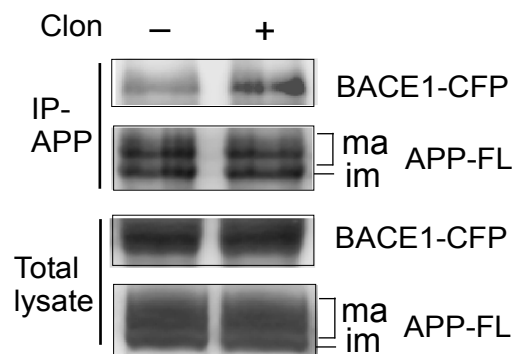

B

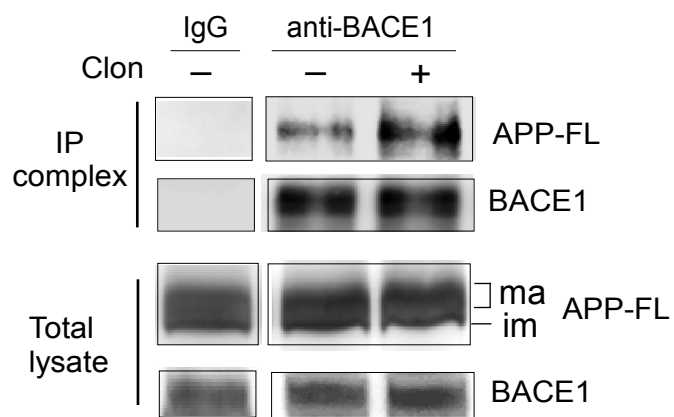

# sFig. 12

**A**

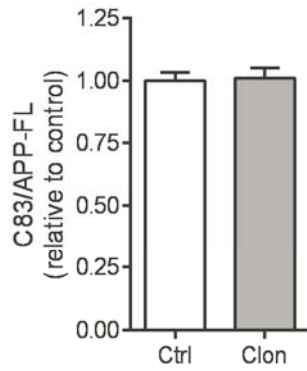

**B**

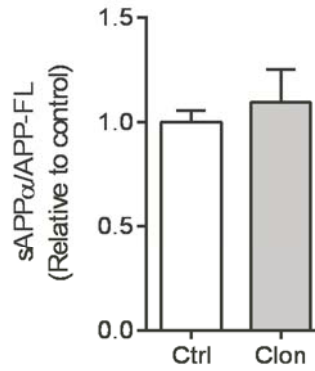

**C**

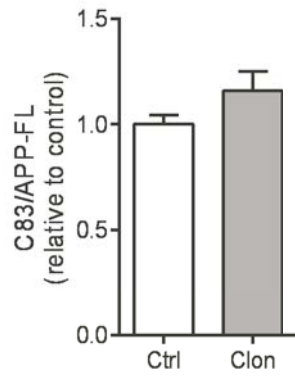

**D**

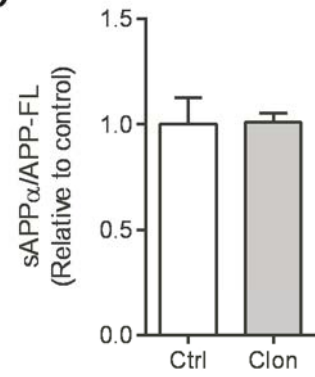

**E**

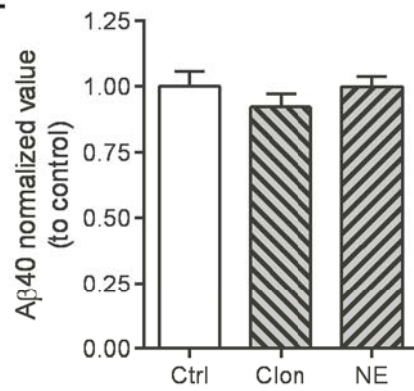

sFig. 13

A

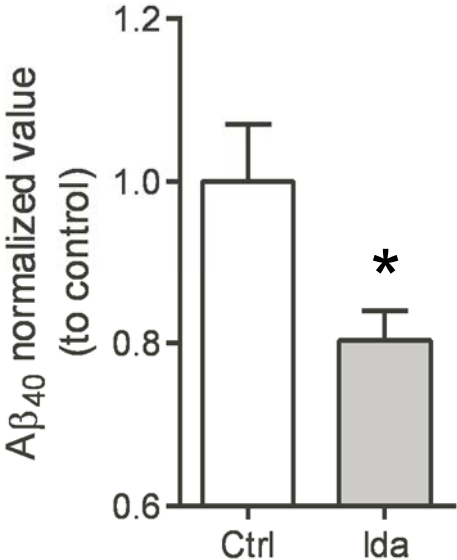

B

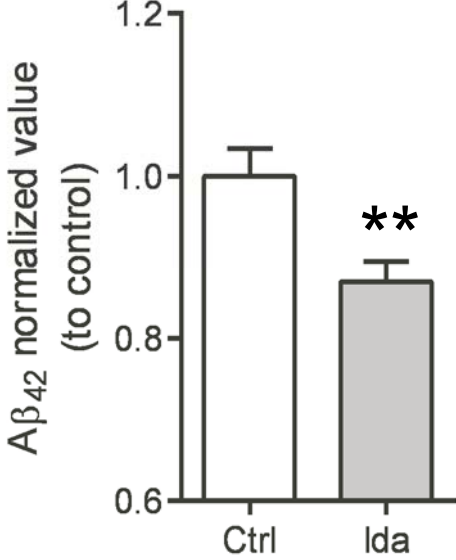

sFig. 14

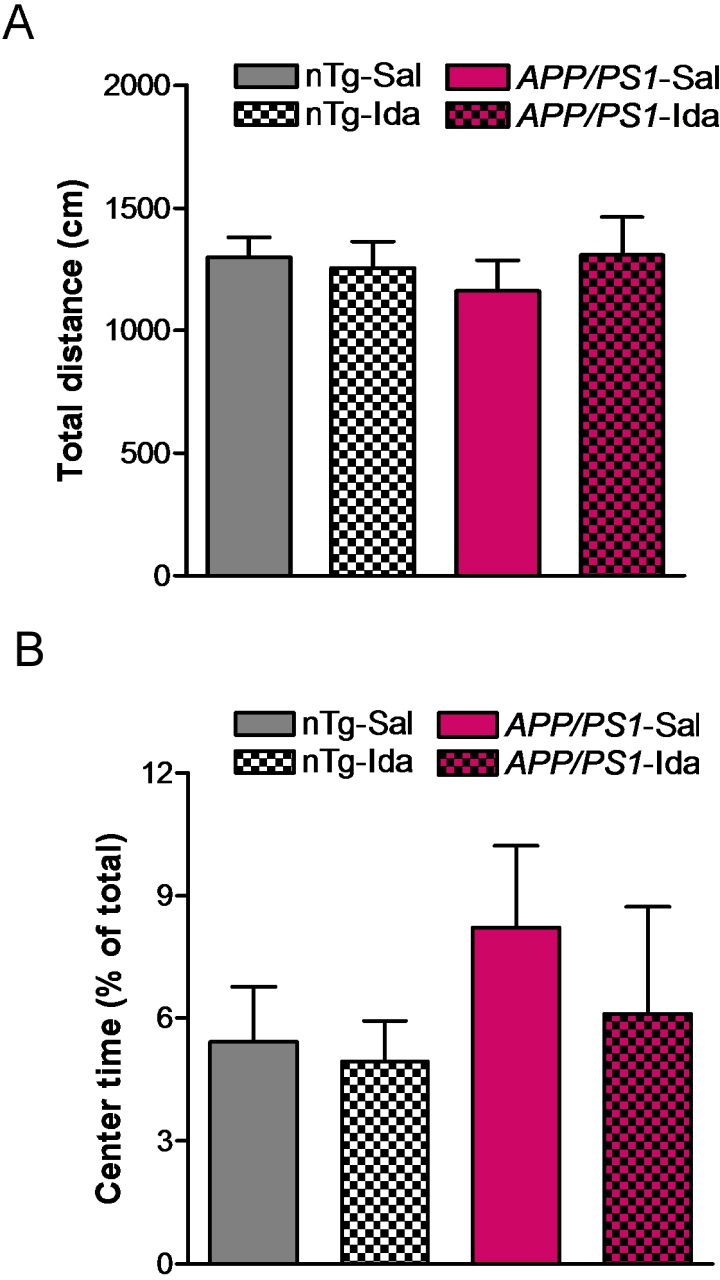



sFig. 15

A

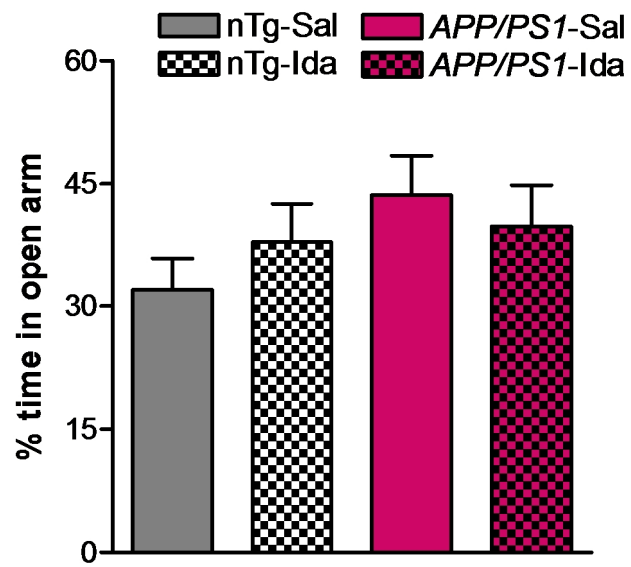

B

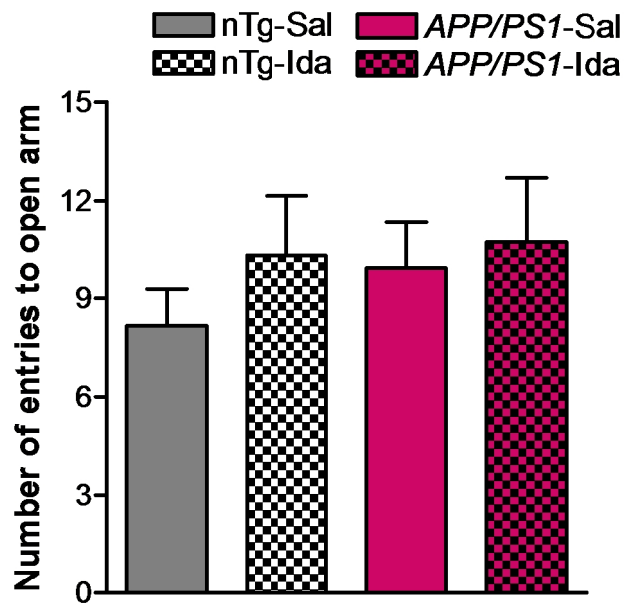

sFig.16

A

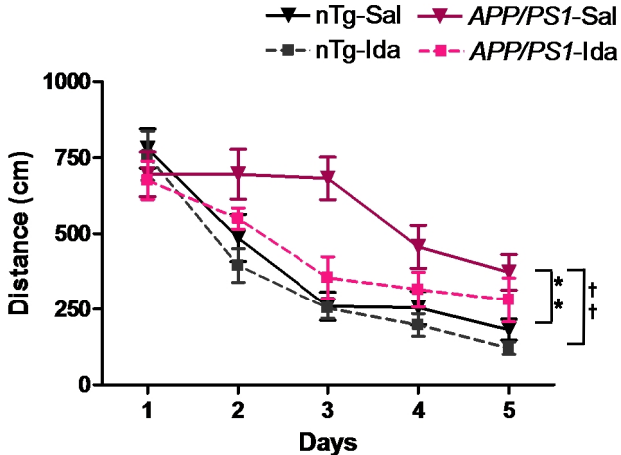

B

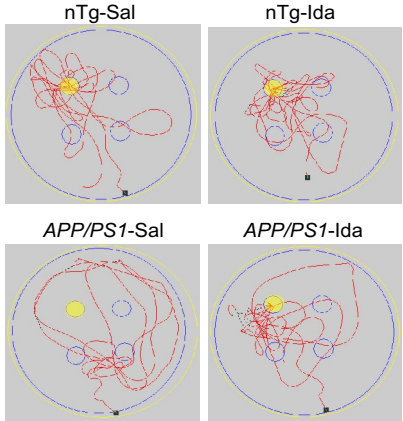

C

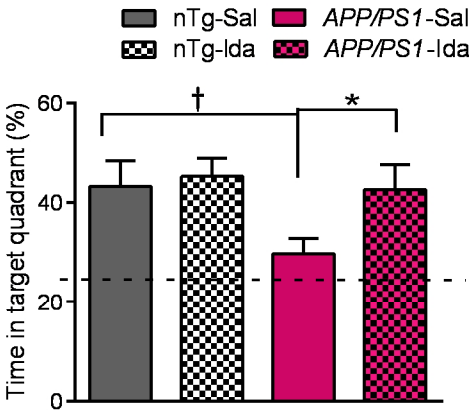

sFig. 17

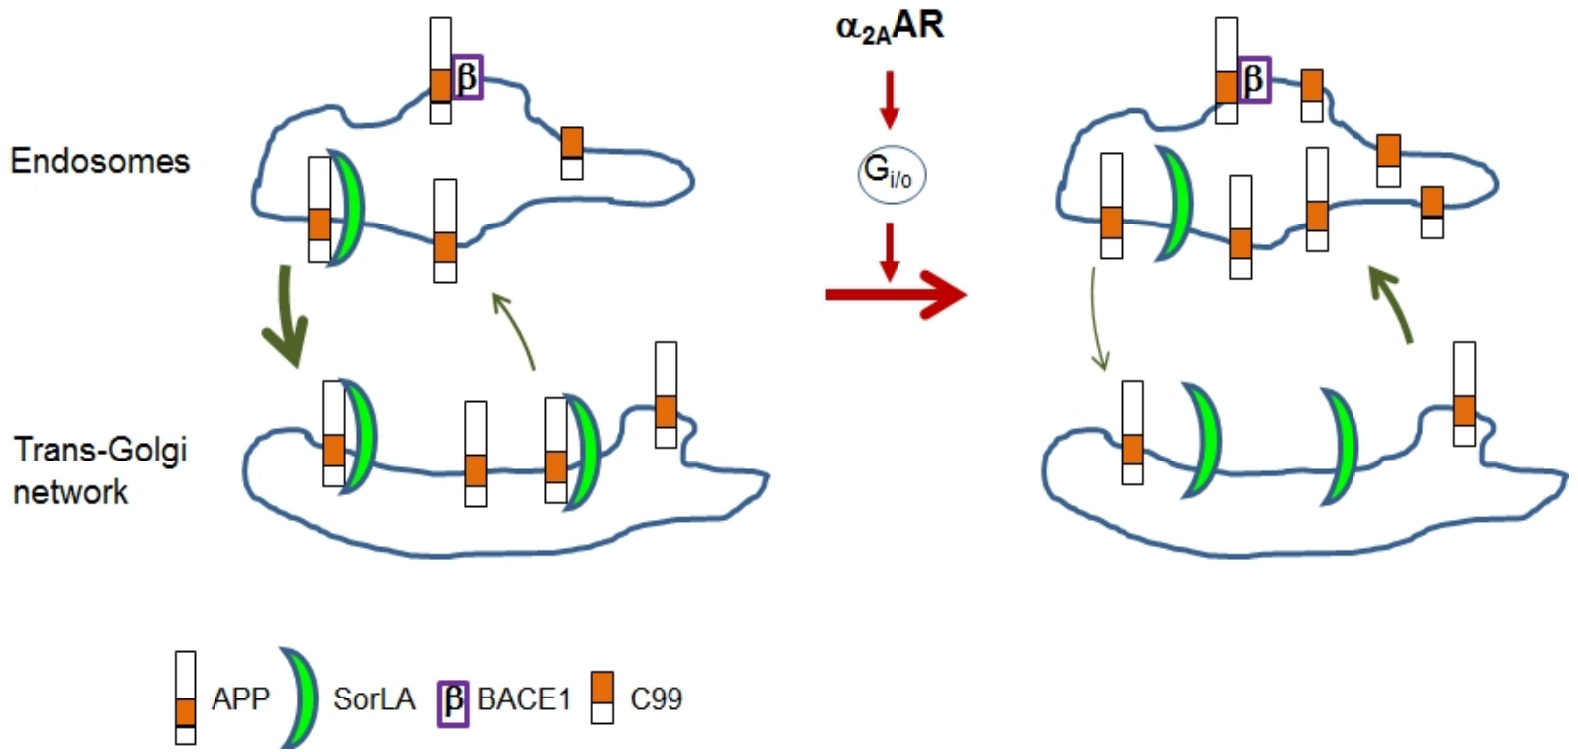

Supplement: pnas.1409513111.sapp.pdf [file pnas.1409513111.sapp.pdf]
